# Supplementary material for: A Descriptive Review of Medication Overuse HEADACHE-from Pathophysiology to the Clinic
Source: Preprints.org preprint supplement (doi:10.20944/preprints202309.0760.v1), 2023-09-12
Supplement: Supplementary file 1 [file supplementary]

# A descriptive review of MEDICATION OVERUSE HEADACHE

## -from pathophysiology to the clinic –

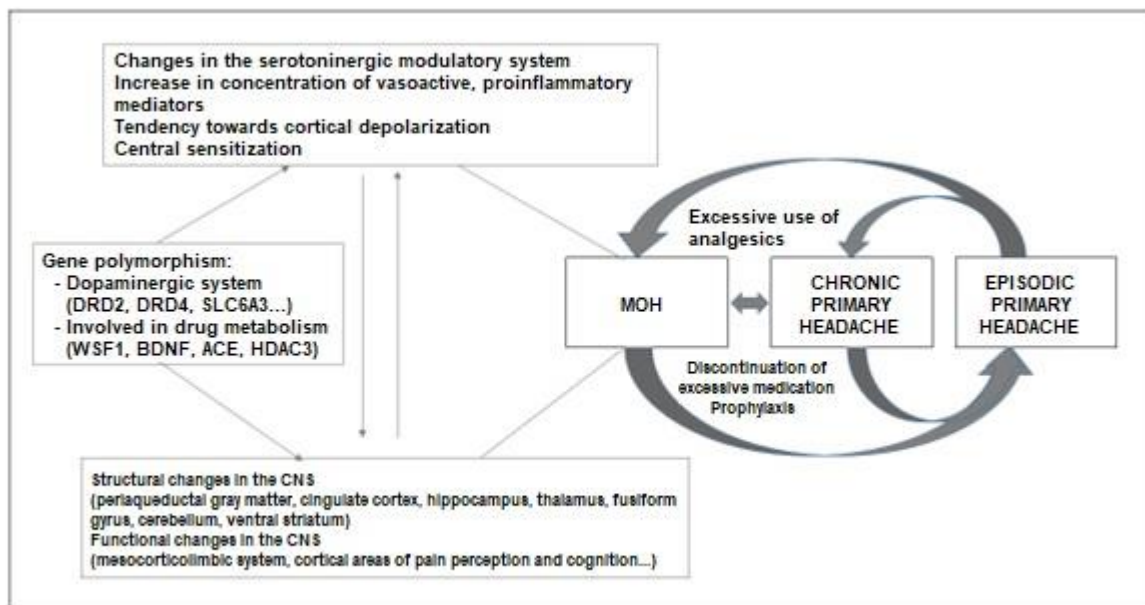

Scheme1. Pathophysiology MOH

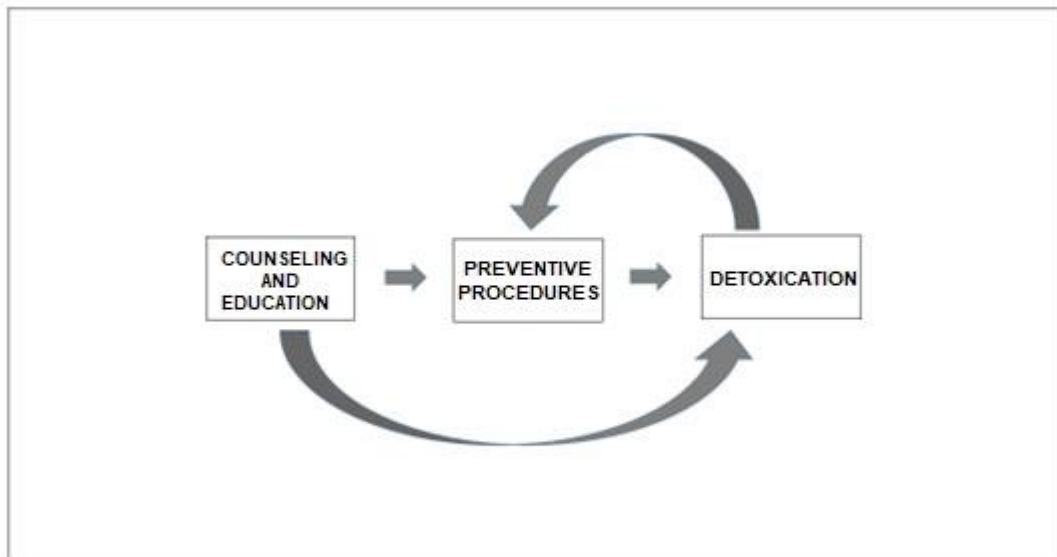

Scheme 2. The algorithm for treating MOH
